# Supplementary material for: Genome-Wide Association Studies of Somatic Cell Count in the Assaf Breed
Source: MDPI journal article supplement (doi:10.3390/ani11061531), 2021-05-24

**Supplementary Figure 2.** Manhattan (a) and Q-Q (b) plots from GWA analysis of estimated SCS trait in Assaf sheep. Chromosomes 1-26, and X (27) are shown separated. Green line in Manhattan plot corresponds to average threshold value for a FDR of 10% evaluated at chromosomal level.

a)

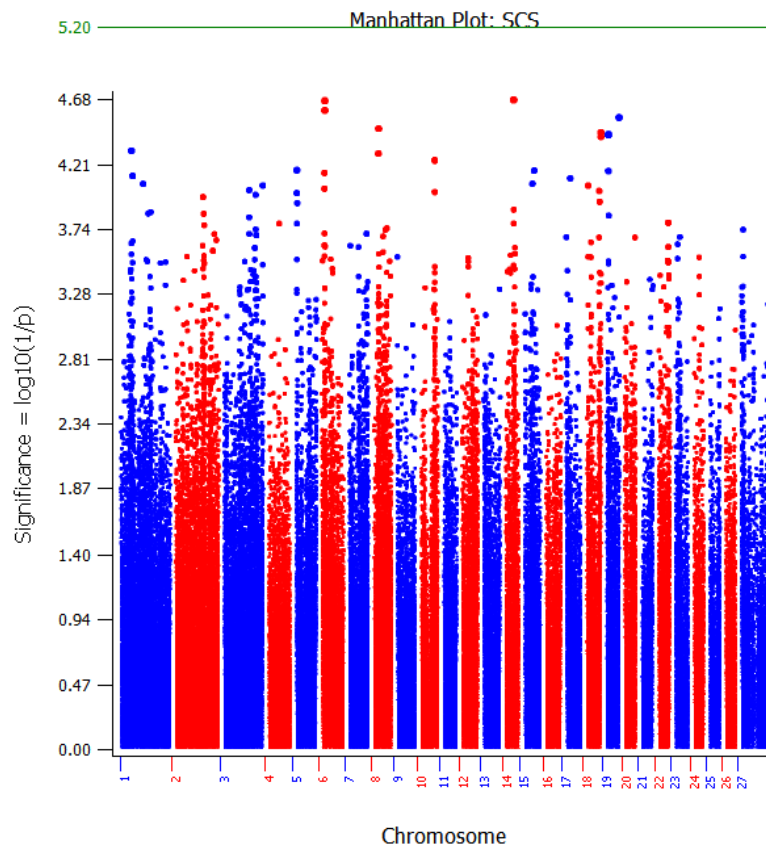

b)

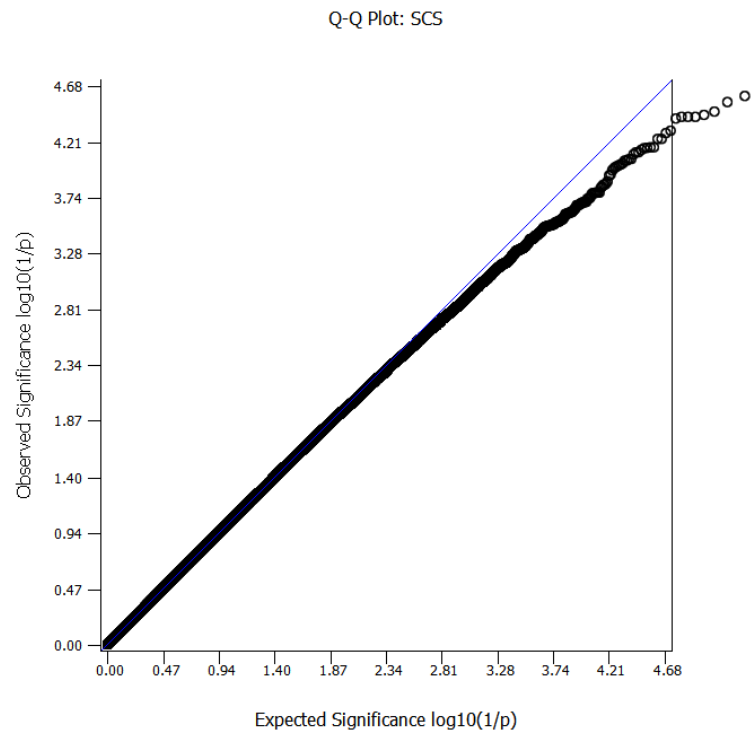

Supplement: s1 [file Supplementary Figure 2.pdf › animals-1211644-supplementary/Supplementary Figure 2.pdf]
